# Supplementary figures and images for: Assessment of Aortoiliac Atherosclerotic Plaque on CT in Prostate Cancer Patients Undergoing Treatment
Source: MDPI journal article supplement (doi:10.3390/tomography8020050), 2022-03-01

**Residual plot**

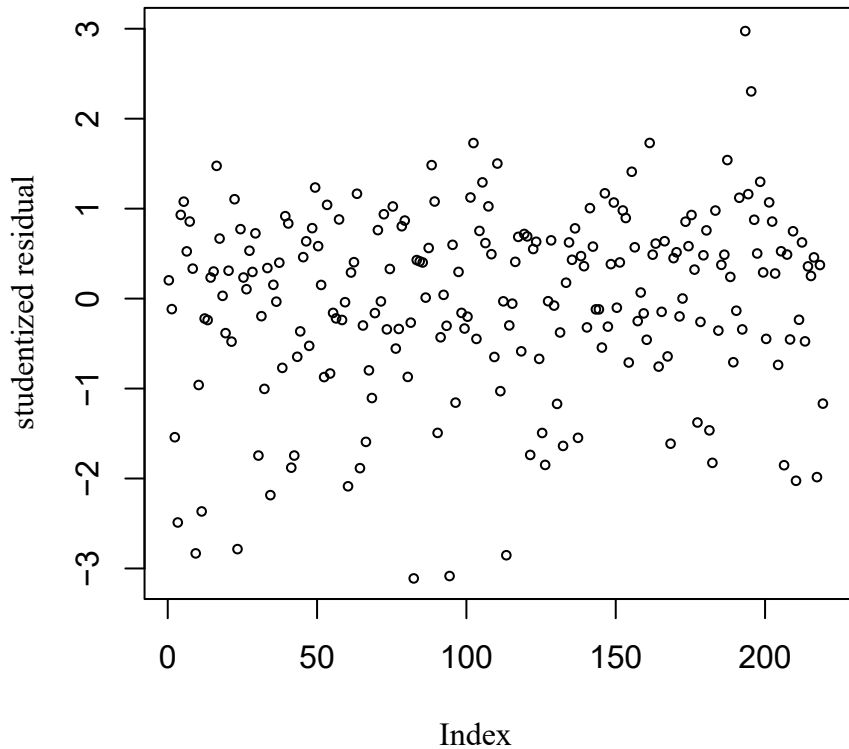

Supplement: s1 [file s1]

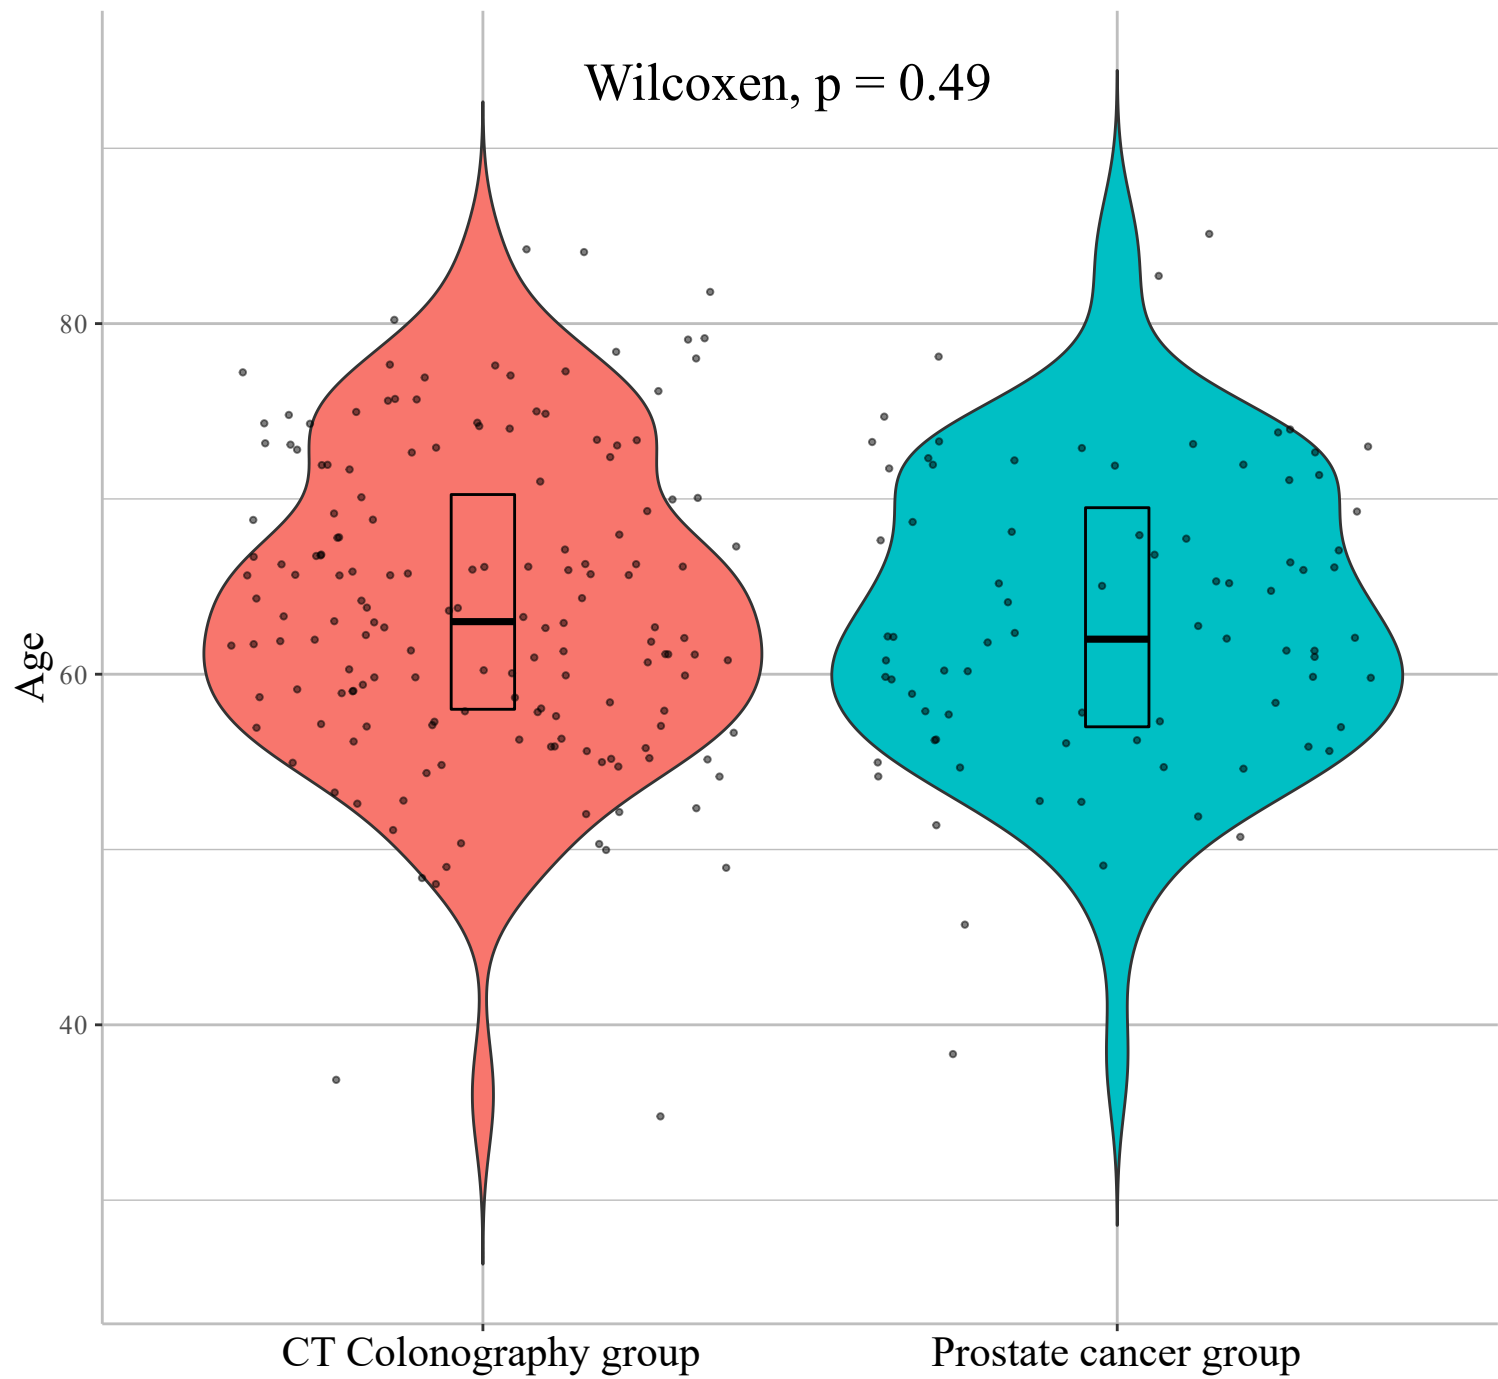

Supplement: s1 [file s1]

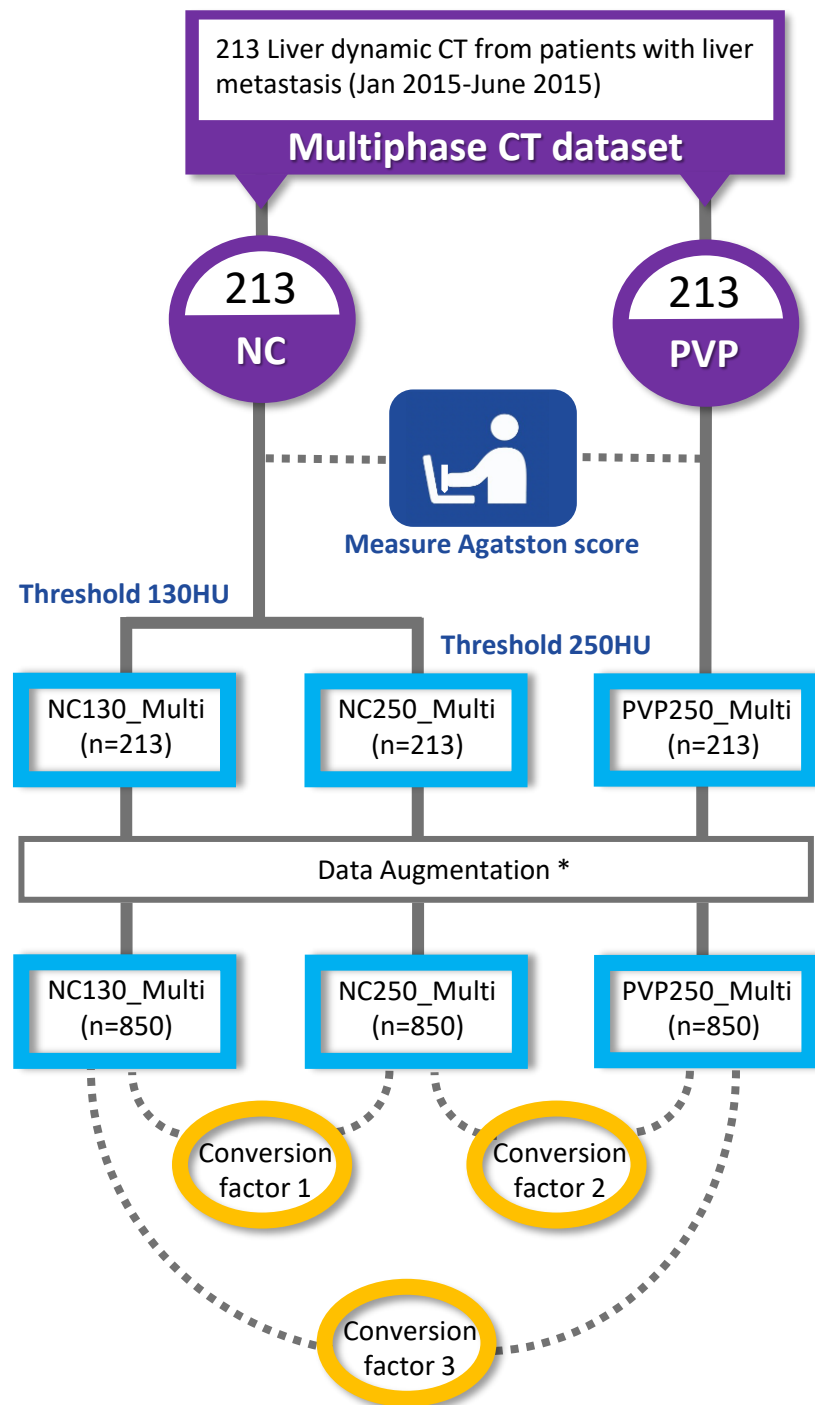

Supplement: s1 [file s1]

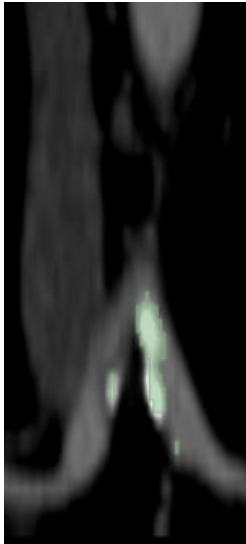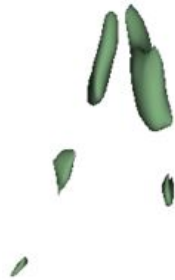

$y=0.672x-4.449$ ,  $p<0.0001$ , adj. R Squared 0.992

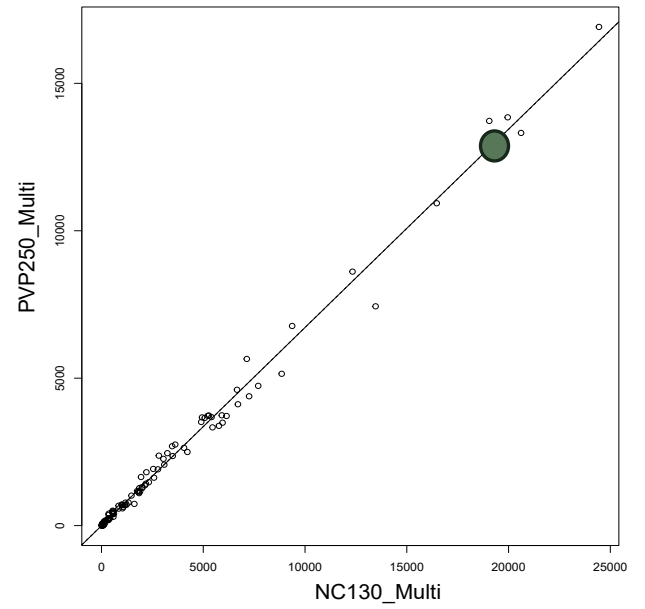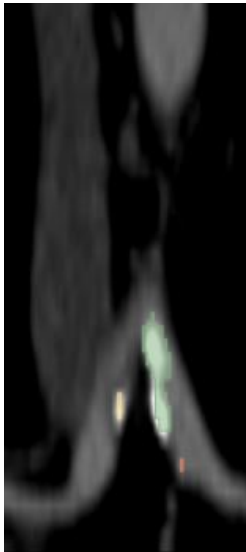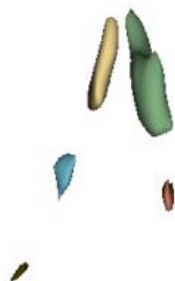

$y=0.653x+7.401$ ,  $p<0.0001$ , adj. R Squared 0.986

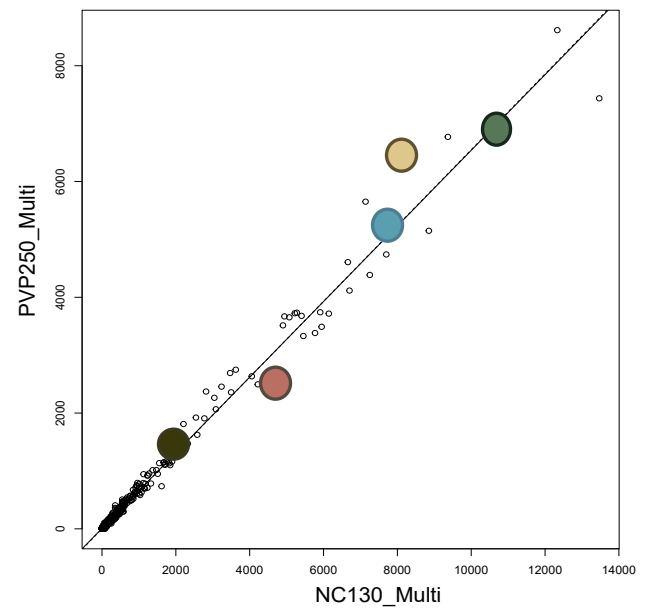

Supplement: s1 [file s1]

# Intraarterial attenuation in PVP of prostate cancer dataset

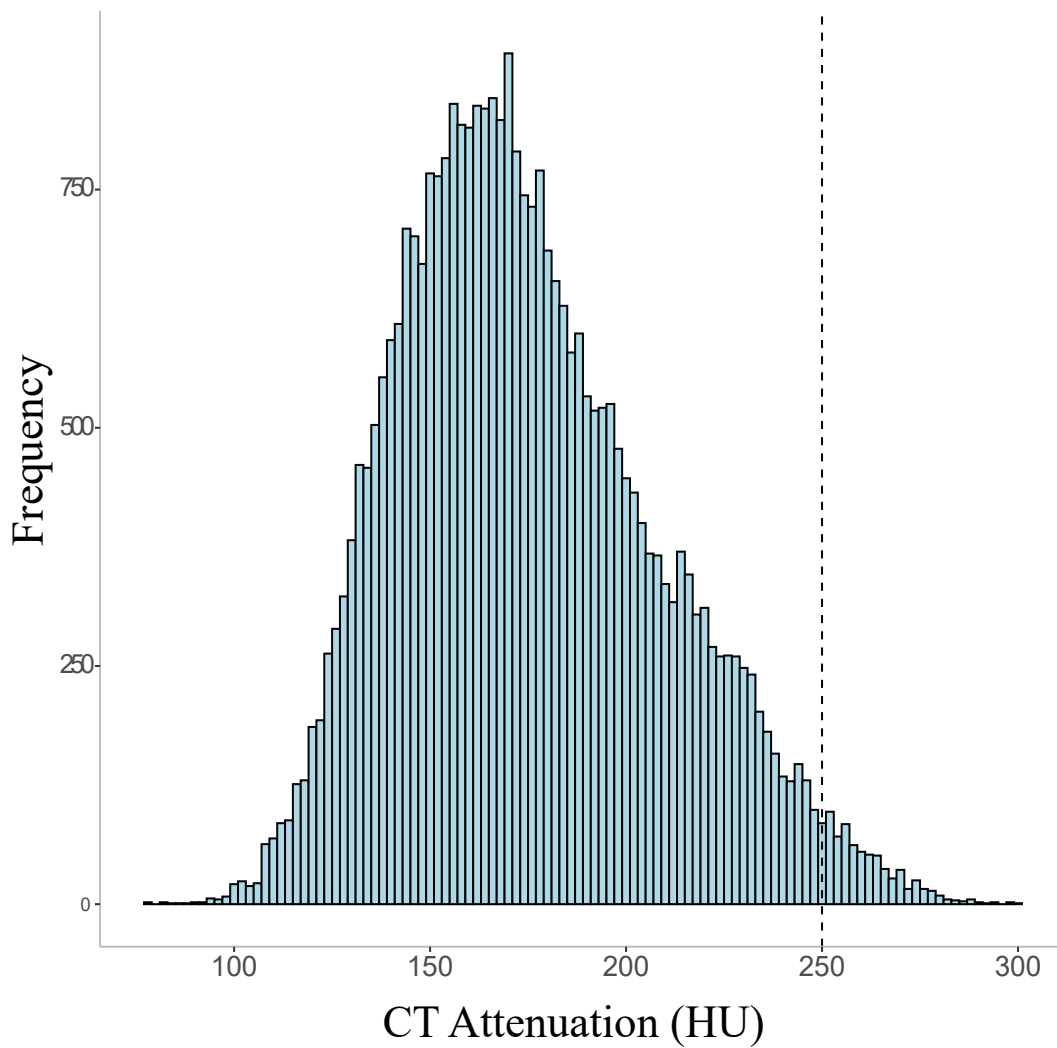

Supplement: s1 [file s1]

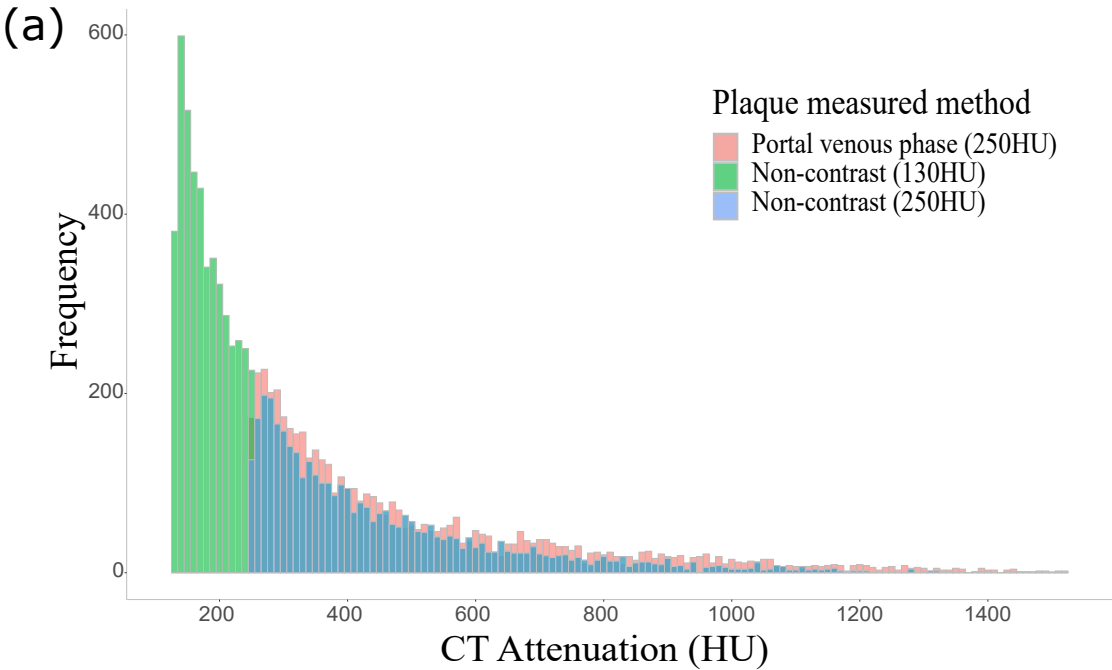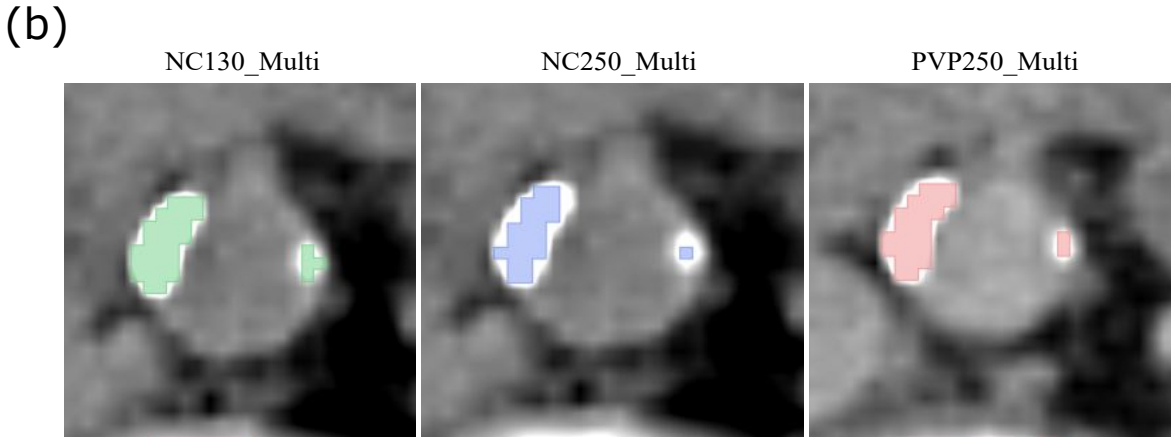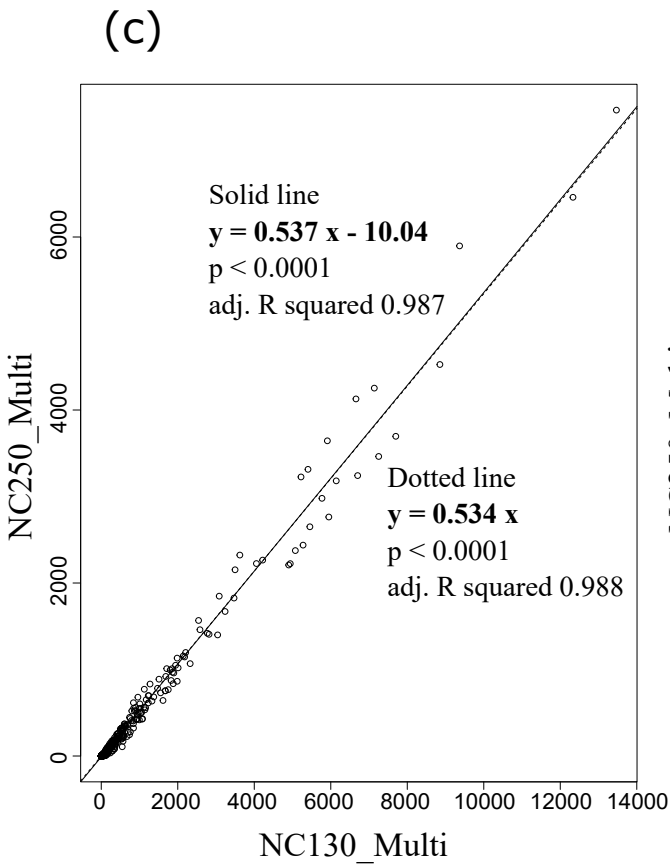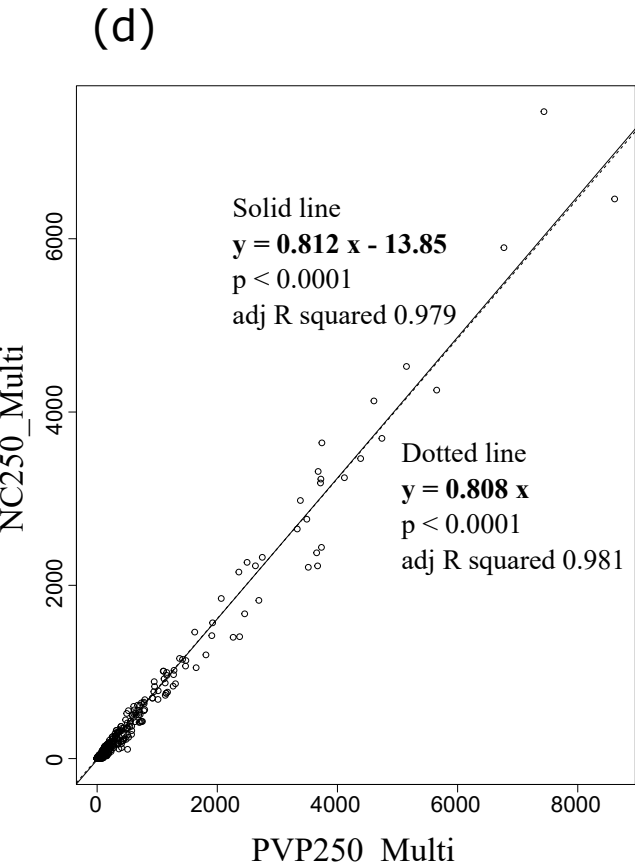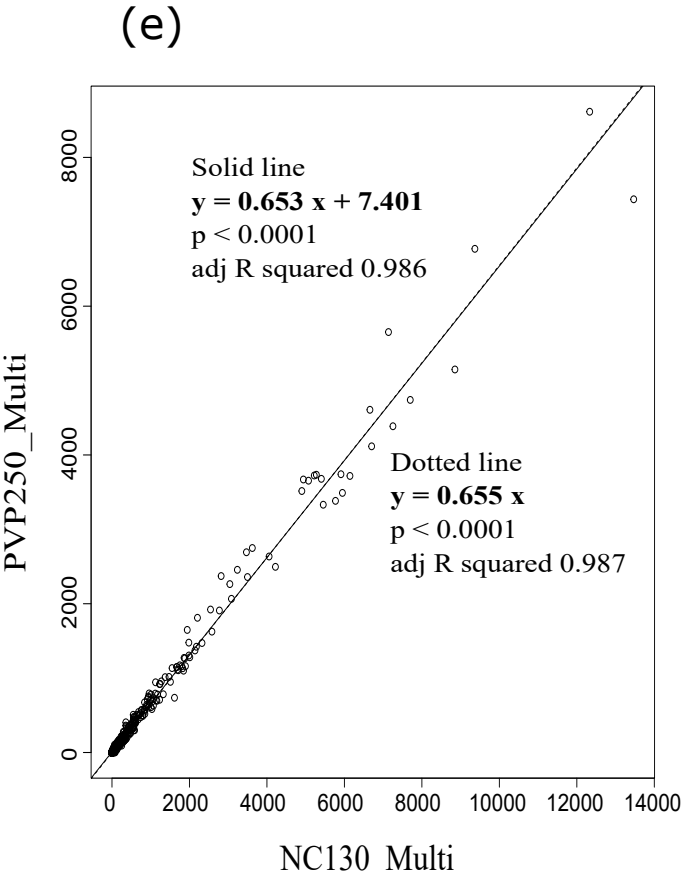

Supplement: s1 [file s1]
